# Supplementary material for: Guillain-Barré syndrome following SARS-CoV-2 vaccination in the UK: a prospective surveillance study
Source: PubMed Central journal article supplement (PMC9277028; doi:10.1136/bmjno-2022-000309), 2022-07-12
Supplement: bmjno-2022-000309supp001.pdf [file bmjno-2022-000309supp001.pdf]

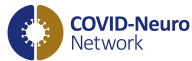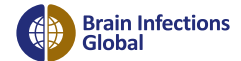

## Suspected Guillain-Barre syndrome or peripheral neuropathy following administration of COVID-19 vaccine\*

| Source of information        |                                                            |                                     |  |
|------------------------------|------------------------------------------------------------|-------------------------------------|--|
| Name of the person reporting |                                                            | Position (e.g. specialty and grade) |  |
| Hospital / Practice          |                                                            | Email address                       |  |
| Type of institution          | Primary Care/ District General Hospital/ Tertiary Hospital |                                     |  |

| Patient Details   |  |                               |  |
|-------------------|--|-------------------------------|--|
| Patient Initials: |  | Yellow Card report reference: |  |
| Sex:              |  | Ethnicity:                    |  |
| Age:              |  |                               |  |

| Patient Background                                     |                 |
|--------------------------------------------------------|-----------------|
| Past Medical History:                                  |                 |
| Regular and recent medications:                        |                 |
| Infectious illness in the last six weeks:              | Yes/ No/ Unsure |
| Other vaccination received in the last six weeks:      | Yes/ No/ Unsure |
| Previous adverse neurological reaction to a vaccine:   | Yes/ No/ Unsure |
| History of neurological disease (previous or current): | Yes/ No/ Unsure |
| Immunosuppression at the time of vaccination:          | Yes/ No/ Unsure |
| If Yes to any above, please provide details:           |                 |

| Patient's Covid-19 Status       |                                                  |
|---------------------------------|--------------------------------------------------|
| Previous diagnosis of Covid-19: | Yes, once/<br>Yes, more than once/<br>No/ Unsure |
| If Yes, date of onset:          | Date:                                            |
| If Yes, means of diagnosis:     | PCR/ Antibody /<br>Clinical                      |

| Vaccination Details                                                                                                                         |             |
|---------------------------------------------------------------------------------------------------------------------------------------------|-------------|
| 1 <sup>st</sup> vaccination: Pfizer-BioNTech/ Oxford- AstraZeneca/ Moderna/<br>Lot number: _____ Dose: _____ Route of administration: _____ | Date: _____ |
| 2 <sup>nd</sup> vaccination: Pfizer-BioNTech/ Oxford- AstraZeneca/ Moderna/<br>Lot number: _____ Dose: _____ Route of administration: _____ | Date: _____ |
| Date of neurological symptoms onset                                                                                                         | Date: _____ |

| Case Definition                                                                                             |                   |
|-------------------------------------------------------------------------------------------------------------|-------------------|
| For GBS: Bilateral flaccid weakness the limbs                                                               | Yes/ No/ Not Sure |
| PLUS Decreased or absent tendon reflexes                                                                    | Yes/ No/ Not Sure |
| PLUS Monophasic illness with peak of symptoms 12h to 28 days from the onset and subsequent clinical plateau | Yes/ No/ Not Sure |
| PLUS Unknown aetiology                                                                                      | Yes/ No/ Not Sure |

\*This form, based on the guidance from the Brighton Collaboration (Sejvar et al., Vaccine 2011; 29: 599–612) and produced by the Covid-Neuro Network of the University of Liverpool's Brain Infections Global Programme, is for recording details of suspected neurological adverse events following immunisation with COVID-19 vaccines. Please feel free to modify as necessary. Please liaise with Professor Tom Solomon and the Covid-Neuro team (Email [COVIDNeuro@liverpool.ac.uk](mailto:COVIDNeuro@liverpool.ac.uk)) if you are interested in contributing your data to the international collaborative study.



| Clinical Features                                                                                                                                                                                                                                                                                                                                                                                          |
|------------------------------------------------------------------------------------------------------------------------------------------------------------------------------------------------------------------------------------------------------------------------------------------------------------------------------------------------------------------------------------------------------------|
| Time from onset to peak symptoms (hrs / days):                                                                                                                                                                                                                                                                                                                                                             |
| Limb weakness with lower motor neuron signs: Yes/ No/ Unsure<br><input type="checkbox"/> Flaccid weakness <input type="checkbox"/> Decreased tone <input type="checkbox"/> Fasciculations <input type="checkbox"/> Atrophy <input type="checkbox"/> Other- describe<br>Affected limbs (select): RUL/ LUL/ RLL/ LLL                                                                                         |
| Sensory deficit (select these that apply): Yes/ No/ Unsure<br><input type="checkbox"/> Light touch <input type="checkbox"/> Proprioception <input type="checkbox"/> Vibration <input type="checkbox"/> Temperature <input type="checkbox"/> Pain <input type="checkbox"/> Tingling/ paraesthesia<br><input type="checkbox"/> Other- describe<br>Describe the distribution:<br>Sensory level: Yes/No/Unsure |
| Deep tendon reflexes (specify: normal/ reduced/ absent for each):<br>Biceps: _____ Triceps: _____ Supinator: _____<br>Knee: _____ Ankle: _____ Plantar: Normal/ Absent/ Upwards                                                                                                                                                                                                                            |
| Is there associated pain? Yes/ No/ Unsure                                                                                                                                                                                                                                                                                                                                                                  |
| Cranial nerve involvement:<br>Ptosis: Yes/ No/ Unsure<br>Diplopia: Yes/ No/Unsure<br>Facial weakness: Yes/ No/ Unsure<br>If yes: right/left/ bilateral If yes: LMN / UMN (forehead sparing)<br>Dysphagia/ bulbar weakness: Yes/ No/ Unsure<br>Cranial nerve involvement not captured above:                                                                                                                |
| Is there shortness of breath? Yes/ No/ Unsure                                                                                                                                                                                                                                                                                                                                                              |
| Is there evidence of neuromuscular respiratory failure? Yes/No/Unsure                                                                                                                                                                                                                                                                                                                                      |
| Is there dysautonomia? Yes/ No/ Unsure                                                                                                                                                                                                                                                                                                                                                                     |
| Is there ataxia or other cerebellar features? Yes/ No/ Unsure                                                                                                                                                                                                                                                                                                                                              |
| Other relevant symptoms and signs, including systemic features:                                                                                                                                                                                                                                                                                                                                            |
| Has the patient experienced a similar neurological event before? Yes/No/Unsure<br>If Yes, please provide details, including the date and suspected triggers:                                                                                                                                                                                                                                               |

| Assessment and investigations to exclude other causes (please indicate which of the following have been considered, and give details at the bottom) |                                     |
|-----------------------------------------------------------------------------------------------------------------------------------------------------|-------------------------------------|
| <b>Clinical assessment</b> (give details at the bottom)                                                                                             |                                     |
| Is there:                                                                                                                                           |                                     |
| ▪ Suspicion of drug-induced neuropathy                                                                                                              | Yes/ No/ Unknown                    |
| ▪ History of recent diarrhoea                                                                                                                       | Yes/ No/ Unknown                    |
| <b>Laboratory investigations</b> (if abnormal give details at the bottom)                                                                           |                                     |
| FBC                                                                                                                                                 | Normal/ Unknown/ Not Done/ Abnormal |
| Urea and electrolytes                                                                                                                               | Normal/ Unknown/ Not Done/ Abnormal |
| Calcium profile and magnesium                                                                                                                       | Normal/ Unknown/ Not Done/ Abnormal |
| CRP                                                                                                                                                 | Normal/ Unknown/ Not Done/ Abnormal |
| HbA1c                                                                                                                                               | Normal/ Unknown/ Not Done/ Abnormal |
| Thyroid function tests                                                                                                                              | Normal/ Unknown/ Not Done/ Abnormal |
| Vasculitic screen: ESR, ANA, anti-ds DNA, SS-A (Ro), SS-B (La), ANCA, complement                                                                    | Normal/ Unknown/ Not Done/ Abnormal |
| Protein electrophoresis                                                                                                                             | Normal/ Unknown/ Not Done/ Abnormal |
| B <sub>12</sub> , folate                                                                                                                            | Normal/ Unknown/ Not Done/ Abnormal |
| Methylmalonic acid                                                                                                                                  | Normal/ Unknown/ Not Done/ Abnormal |
| Vitamin E                                                                                                                                           | Normal/ Unknown/ Not Done/ Abnormal |
| Angiotensin converting enzyme                                                                                                                       | Normal/ Unknown/ Not Done/ Abnormal |
| Serum paraneoplastic antibodies*                                                                                                                    | Normal/ Unknown/ Not Done/ Abnormal |
| Syphilis serology                                                                                                                                   | Normal/ Unknown/ Not Done/ Abnormal |

\*This form, based on the guidance from the Brighton Collaboration (Sejvar et al., Vaccine 2011; 29: 599–612) and produced by the Covid-Neuro Network of the University of Liverpool's Brain Infections Global Programme, is for recording details of suspected neurological adverse events following immunisation with COVID-19 vaccines. Please feel free to modify as necessary. Please liaise with Professor Tom Solomon and the Covid-Neuro team (Email [COVIDNeuro@liverpool.ac.uk](mailto:COVIDNeuro@liverpool.ac.uk)) if you are interested in contributing your data to the international collaborative study.



|                                                                                                                                           |                                                                              |
|-------------------------------------------------------------------------------------------------------------------------------------------|------------------------------------------------------------------------------|
| HIV serology                                                                                                                              | Normal/ Unknown/ Not Done/ Abnormal                                          |
| Lyme disease serology                                                                                                                     | Normal/ Unknown/ Not Done/ Abnormal                                          |
| Campylobacter jejuni serology                                                                                                             | Normal/ Unknown/ Not Done/ Abnormal                                          |
| COVID-19 PCR                                                                                                                              | Normal/ Unknown/ Not Done/ Abnormal                                          |
| Respiratory viruses screen (swab)                                                                                                         | Normal/ Unknown/ Not Done/ Abnormal                                          |
| Stool culture                                                                                                                             | Normal/ Unknown/ Not Done/ Abnormal                                          |
| *Please list the antibodies tested in the paraneoplastic panel:                                                                           |                                                                              |
| Have the antiganglioside antibodies been tested? If yes, please provide results:<br>anti-GM1/ GM2/ GD1a/ GD1b/ GQ1b<br>IgG/ IgM           |                                                                              |
| CSF Biochemistry: CSF Protein: _____ CSF: Serum Glucose Ratio: _____<br>CSF RCC: _____ CSF WCC: _____ CSF differential: _____ Date: _____ |                                                                              |
| CSF Oligoclonal bands                                                                                                                     | Normal/ Unknown/ Not Done/ Abnormal                                          |
| CSF Cytology                                                                                                                              | Normal/ Unknown/ Not Done/ Abnormal                                          |
| CSF Microscopy & culture                                                                                                                  | Normal/ Unknown/ Not Done/ Abnormal                                          |
| CSF Virology*                                                                                                                             | Normal/ Unknown/ Not Done/ Abnormal                                          |
| *Please list the pathogens tested within the CSF virology panel:                                                                          |                                                                              |
| Any other relevant laboratory results:                                                                                                    |                                                                              |
| <b>Radiological studies</b> (if abnormal give details at the bottom)                                                                      |                                                                              |
| CT Head                                                                                                                                   | Normal/ Unknown/ Not Done/ Abnormal                                          |
| MRI Head                                                                                                                                  | Normal/ Unknown/ Not Done/ Abnormal                                          |
| MRI Spine                                                                                                                                 | Normal/ Unknown/ Not Done/ Abnormal                                          |
| <b>Nerve conduction studies:</b>                                                                                                          | Demyelinating/ Axonal/ Inexcitable / Equivocal/<br>Normal/ Unknown/ Not done |
| <b>Nerve biopsy:</b>                                                                                                                      | Normal/ Unknown/ Not Done/ Abnormal                                          |
| <b>Details of any abnormal findings (please provide NCS report if available):</b>                                                         |                                                                              |
| <b>Please describe if any of the findings could explain the aetiology of the event:</b>                                                   |                                                                              |

| Treatment                                                                   |       |
|-----------------------------------------------------------------------------|-------|
| Please write YES and provide the dates for each treatment that was started: |       |
| IV Immunoglobulin                                                           | Date: |
| Plasma exchange                                                             | Date: |
| Steroids (IV)                                                               | Date: |
| Steroids (Oral)                                                             | Date: |
| Intubation and ventilation                                                  | Date: |
| Other treatments not listed above:                                          |       |

| Patient Outcome                                                                                                                     |
|-------------------------------------------------------------------------------------------------------------------------------------|
| Date information provided:                                                                                                          |
| Maximum level of care required:<br>Outpatient/ Medical Inpatient/ High Dependency Unit/ Intensive Care Unit                         |
| Clinical progression:<br>Was there a NEW deterioration after 8 weeks?<br>Were there more than three treatment related fluctuations? |
| Patient alive at last follow-up: Yes/ No                                                                                            |

\*This form, based on the guidance from the Brighton Collaboration (Sejvar et al., Vaccine 2011; 29: 599–612) and produced by the Covid-Neuro Network of the University of Liverpool's Brain Infections Global Programme, is for recording details of suspected neurological adverse events following immunisation with COVID-19 vaccines. Please feel free to modify as necessary. Please liaise with Professor Tom Solomon and the Covid-Neuro team (Email [COVIDNeuro@liverpool.ac.uk](mailto:COVIDNeuro@liverpool.ac.uk)) if you are interested in contributing your data to the international collaborative study.



|                                                                                                                                                                                                                     |
|---------------------------------------------------------------------------------------------------------------------------------------------------------------------------------------------------------------------|
| If No, was GBS or neuropathy included on the death certificate: Yes/ No/ Unknown<br>If relevant, date of death:                                                                                                     |
| Has this patient been discharged: Yes/ No<br>If Yes, discharge destination:<br>Usual place of residence/ Other community/ Transfer to another hospital/ Inpatient rehabilitation/<br>If yes, Duration of admission: |
| Modified Ranking Scale:<br>Before adverse event: _____<br>At the discharge (if not discharged, then current mRS): _____<br>GBS Disability Score at nadir:<br>GBS Disability Score at three months:                  |
| Has the patient had any further COVID-19 vaccinations since the event?<br>If yes, please provide brand, date and outcome:                                                                                           |
| Additional details:                                                                                                                                                                                                 |

| GBS Disability Score (for reference only) |                                                                |
|-------------------------------------------|----------------------------------------------------------------|
| 0                                         | Normal                                                         |
| 1                                         | Minor symptoms but able to run                                 |
| 2                                         | Able to walk 10 m or more without assistance but unable to run |
| 3                                         | Able to walk 10 m across an open space with help               |
| 4                                         | Bedridden or chairbound                                        |
| 5                                         | Requiring assisted ventilation for at least part of the day    |
| 6                                         | Dead                                                           |

\*This form, based on the guidance from the Brighton Collaboration (Sejvar et al., Vaccine 2011; 29: 599–612) and produced by the Covid-Neuro Network of the University of Liverpool's Brain Infections Global Programme, is for recording details of suspected neurological adverse events following immunisation with COVID-19 vaccines. Please feel free to modify as necessary. Please liaise with Professor Tom Solomon and the Covid-Neuro team (Email [COVIDNeuro@liverpool.ac.uk](mailto:COVIDNeuro@liverpool.ac.uk)) if you are interested in contributing your data to the international collaborative study.
